# Supplementary material for: Wheat and Cereal Rye Inter-Row Living Mulches Interfere with Early Season Weeds in Soybean
Source: MDPI journal article supplement (doi:10.3390/plants10112276), 2021-10-24
Supplement: s1 [file s1]

**Table S1.** Spring-seeded wheat or rye inter-row living mulch seedling density in soybean under volunteer canola interference as influenced by soybean/living mulch spatial arrangement, and mulch species in each environment individually and in a combined analysis.

| Spatial Arrangement | Mulch Type | Mulch Plant Density <sup>a</sup> (Plants m <sup>-2</sup> ) |             |             |                |
|---------------------|------------|------------------------------------------------------------|-------------|-------------|----------------|
|                     |            | Carman 2013                                                | Carman 2014 | Melita 2014 | Combined       |
| 38 cm               |            | 115                                                        | 69 A        | 66 A        | - <sup>b</sup> |
| 76 cm               |            | 158                                                        | 35 B        | 39 B        | -              |
|                     | Wheat      | -                                                          | -           | -           | 91 a           |
|                     | Rye        | -                                                          | -           | -           | 70 b           |

<sup>a</sup> Within columns and effect groupings, different letters indicate significant differences based on Tukey's HSD ( $\alpha = 0.05$ ). <sup>b</sup> A dash (-) indicates lack of significant F-test effect.

**Table S2.** Soybean seedling density under volunteer canola interference as influenced by soybean/living mulch spatial arrangement, herbicide regime, and the presence or absence of spring-seeded wheat or rye inter-row mulches in each environment individually.

| Spatial Arrangement | Herbicide Regime | Mulch Type <sup>a</sup> | Soybean Plant Density <sup>b</sup> (Plants m <sup>-2</sup> ) |             |             |
|---------------------|------------------|-------------------------|--------------------------------------------------------------|-------------|-------------|
|                     |                  |                         | Carman 2013                                                  | Carman 2014 | Melita 2014 |
| 38 cm               | Clodinafop       | Absent                  | 43                                                           | 48 a        | 16          |
|                     |                  | Wheat (L)               | 48                                                           | 42 a        | 18          |
|                     |                  | Rye (L)                 | 42                                                           | 31 bc       | 13          |
|                     | Glyphosate       | Absent                  | 43                                                           | 33 ab       | 15          |
|                     |                  | Wheat (T)               | 48                                                           | 31 abcd     | 16          |
|                     |                  | Rye (T)                 | 42                                                           | 40 ab       | 15          |
| 76 cm               | Clodinafop       | Absent                  | 45                                                           | 18 cd       | 19          |
|                     |                  | Wheat (L)               | 45                                                           | 14 d        | 13          |
|                     |                  | Rye (L)                 | 39                                                           | 22 cd       | 16          |
|                     | Glyphosate       | Absent                  | 45                                                           | 19 cd       | 17          |
|                     |                  | Wheat (T)               | 45                                                           | 22 cd       | 13          |
|                     |                  | Rye (T)                 | 39                                                           | 27 cd       | 16          |

<sup>a</sup> Abbreviations: L, living; T, terminated mid-season. <sup>b</sup> Within columns, different letters indicate significant differences based on Tukey's HSD ( $\alpha = 0.05$ ).

**Table S3.** The percentage of volunteer canola seeds that were returned to the soil seedbank due to seed losses prior to or during soybean harvest in two different herbicide regimes in three environments individually and in a combined analysis.

| <b>Herbicide<br/>Regime</b> | <b>Volunteer Canola Seed Return <sup>a</sup> (%)</b> |                    |                    |                 |
|-----------------------------|------------------------------------------------------|--------------------|--------------------|-----------------|
|                             | <b>Carman 2013</b>                                   | <b>Carman 2014</b> | <b>Melita 2014</b> | <b>Combined</b> |
| Clodinafop                  | 59                                                   | 36 b               | 59                 | 51 b            |
| Glyphosate                  | 58                                                   | 75 a               | 67                 | 67 a            |

<sup>a</sup> Within columns, different letters indicate significant differences based on Tukey's HSD ( $\alpha = 0.05$ ).
